# Supplementary material for: The educational value of ward rounds for junior trainees
Source: PubMed Central journal article supplement (PMC4408315; doi:10.3402/meo.v20.27559), 2015-04-21
Supplement: MEO-20-27559-s001.pdf [file MEO-20-27559-s001.pdf]

## Appendix 1

### Part 1: Demographic data

Please tick the correct box:

1. Grade: F1  F2

2. Sex: Male  Female

3. Current rotation:

Medicine  Surgery  Other  .....(please specify)

("Other" category: if your rotation does not have ward rounds, then please consider your last rotation where ward rounds were available and mention if this was a medical or surgical rotation in brackets)

### Part 2: Characteristics of ward rounds (WRs)

Please answer the following questions:

1. On how many consultant/SpR-led WR per week do you take part? \_\_\_

2. What is the average duration of a WR (in mins)? \_\_\_

3. How much time on average do you spend with each patient on the WR (in mins)? \_\_\_

|                                                                                                                                                               | None | Small amount | Moderate amount | Significant amount |
|---------------------------------------------------------------------------------------------------------------------------------------------------------------|------|--------------|-----------------|--------------------|
| 4. How much time during an average WR is devoted to <u>teaching</u> (both formal and informal)?                                                               |      |              |                 |                    |
| 5. WRs contribute in how much of your <u>total learning</u> ?                                                                                                 |      |              |                 |                    |
| 6. How much time during the WR is spent on <u>routine administrative tasks</u> (such as, organising investigations, finding forms, completing paperwork etc)? |      |              |                 |                    |

7. Do you regard the WR in your hospital as: (please circle)

- a. A ward round with no teaching at all, focusing on service only
- b. A ward round which incorporates some teaching into service provision
- c. a mixture of both

8. Please tick the relevant box:

|                                       | Never | On few WRs | On some WRs | On most WRs | On every WR |
|---------------------------------------|-------|------------|-------------|-------------|-------------|
| I have opportunities to ask questions |       |            |             |             |             |
| The consultant/SpR asks me questions  |       |            |             |             |             |
| I present patients on the WR          |       |            |             |             |             |
| I learn something new on the WR       |       |            |             |             |             |

|                                      |  |  |  |  |  |
|--------------------------------------|--|--|--|--|--|
| I receive feedback on my performance |  |  |  |  |  |
|--------------------------------------|--|--|--|--|--|

**Part 3: Learning opportunities**

Please rate (1=not at all beneficial, 5=extremely beneficial) how beneficial WRs are in teaching you the following skills by ticking the relevant box:

| Skills learnt               | 1 (=not beneficial) | 2 | 3 | 4 | 5 (=extremely beneficial) |
|-----------------------------|---------------------|---|---|---|---------------------------|
| Conveying medical knowledge |                     |   |   |   |                           |
| History taking              |                     |   |   |   |                           |
| Physical examination        |                     |   |   |   |                           |
| Diagnostic investigations   |                     |   |   |   |                           |
| Patient management          |                     |   |   |   |                           |
| Communication skills        |                     |   |   |   |                           |
| Time management             |                     |   |   |   |                           |
| Record keeping              |                     |   |   |   |                           |
| Teamworking                 |                     |   |   |   |                           |
| Presentation skills         |                     |   |   |   |                           |
| Leadership skills           |                     |   |   |   |                           |
| Ethical principles          |                     |   |   |   |                           |
| Approach towards patients   |                     |   |   |   |                           |

Please rank the following learning events in terms of their educational value (1=most useful, 6= less useful):

| Learning event    | Rank |
|-------------------|------|
| Reading textbooks |      |

|                                                                                                  |  |
|--------------------------------------------------------------------------------------------------|--|
| Ward round                                                                                       |  |
| Reading journals                                                                                 |  |
| Lectures/presentations (such as Grand Round, weekly Foundation Programme mandatory teaching etc) |  |
| Online educational resources (such as BMJ learning, Pastest, Onexamination etc)                  |  |
| Conferences                                                                                      |  |

**Part 4: Obstacles to effective learning**

Which of the following factors are making learning on WRs problematic? (please tick the relevant box)

| Factor                                                                                         | 1 (=strongly disagree) | 2 | 3 | 4 | 5 (=strongly agree) |
|------------------------------------------------------------------------------------------------|------------------------|---|---|---|---------------------|
| Lack of time                                                                                   |                        |   |   |   |                     |
| Large number of patients                                                                       |                        |   |   |   |                     |
| Interruptions (eg bleeps/ having to leave the WR to organise investigations or find forms etc) |                        |   |   |   |                     |
| Lack of interest from seniors                                                                  |                        |   |   |   |                     |
| Bedside crowding                                                                               |                        |   |   |   |                     |
| Patient factors (eg compliance, meal times, not being available)                               |                        |   |   |   |                     |
| Ward environment ( eg busy, noisy)                                                             |                        |   |   |   |                     |
| Team structure                                                                                 |                        |   |   |   |                     |
| Over-reliance on technology                                                                    |                        |   |   |   |                     |
| Other.....                                                                                     |                        |   |   |   |                     |

**Part 5: Areas for improvement**

Please make 3 suggestions to improve the quality of the teaching on WRs:

- 1)
- 2)
- 3)

**Part 6: Characteristics of successful ward rounds**

Please rate the following factors in terms of their importance in making WRs an educationally valuable experience for you: (please tick the relevant box)

| Factor              | Examples                                                                                                                                                            | 1<br>(=strongly disagree) | 2 | 3 | 4 | 5<br>(=strongly agree) |
|---------------------|---------------------------------------------------------------------------------------------------------------------------------------------------------------------|---------------------------|---|---|---|------------------------|
| Learning atmosphere | The consultant/ SpR is:<br>-approachable<br>-Enthusiastic towards teaching<br>-Gives you feedback<br>-not in a rush                                                 |                           |   |   |   |                        |
| Clinical Teaching   | The consultant/ SpR:<br>-Is a role model<br>-Shares his/her thought processes<br>-Sets aside time to teach<br>-Discusses relevant evidence-based studies/literature |                           |   |   |   |                        |

|                            |                                                                                                                                                                                        |  |  |  |  |  |
|----------------------------|----------------------------------------------------------------------------------------------------------------------------------------------------------------------------------------|--|--|--|--|--|
|                            | -Looks holistically at the patient                                                                                                                                                     |  |  |  |  |  |
| Teaching style             | The consultant/ SpR:<br>-Asks questions<br>-Demonstrates key physical findings<br>-Creates succinct teaching points<br>-Allows trainee involvement (eg to ask questions/present cases) |  |  |  |  |  |
| Communicating expectations | The consultant/ SpR:<br>-States what is expected of trainees during the WR<br>-Allows team some independence in decision making<br>-Sets feasible teaching and learning goals          |  |  |  |  |  |
| Team management            | The consultant/ SpR:<br>-Conducts WRs in an organised, efficient and timely fashion<br>-Can maintain interest in all members of the team<br>-Has a consistent, coherent plan of care   |  |  |  |  |  |
